# Supplementary material for: Deep eutectic solvent systems for FeCl3-catalyzed oxidative polymerization of 3-octylthiophene
Source: Royal Society of Chemistry journal article supplement (doi:10.1039/c6gc02789j), 2016-12-15
Supplement: c6gc02789j1.pdf [file c6gc02789j1.pdf]

1

2           Electronic Supplementary Material (ESI) for Green Chemistry

3

4           **Deep Eutectic Solvent Systems for FeCl<sub>3</sub>-catalyzed Oxidative**  
5                           **Polymerization of 3-Octylthiophene**

6

7                           Tae-Joon Park<sup>a</sup> and Sang Hyun Lee<sup>b,\*</sup>

8

9    <sup>a</sup>*Nano Systems Institute, Seoul National University, 1 Gwanak-ro, Gwanak-gu, Seoul 151-744, Korea*

10 <sup>b</sup>*Department of Microbial Engineering, Konkuk University, Hwayang-Dong, Gwangjin-Gu, Seoul 143-701, Korea*

11

12

13

14

15

16   \*Corresponding author

17   Tel: +82-2-2049-6269

18   Fax: +82-2-3437-8360

19   E-mail: [sanghlee@konkuk.ac.kr](mailto:sanghlee@konkuk.ac.kr)

21 ***SI. Experimental details***

22

23 **Materials**

24 Choline chloride, urea, glycerol, ethylene glycol, formamide, thiourea, Ferric chloride and 3-  
25 octylthiophene (3OT) monomer were purchased from Sigma-Aldrich.

26

27 **Preparation of DES mixtures**

28 DES mixtures were prepared by mixing choline chloride with various HBD partners as shown in  
29 our previous article.<sup>10</sup>

30

31 **Synthesis of P3OT**

32 FeCl<sub>3</sub> (273 mg, 1.68 mmol) and the selected DES (for example, 5 g of [Ch]Cl:urea) were put into  
33 round-bottom flask. Then, 3OT (83 mg, 0.42 mmol) was dropped into a magnetically stirred  
34 suspension of FeCl<sub>3</sub> in the selected DES at 25°C or 50°C. After the reaction, DESs and FeCl<sub>3</sub>  
35 were removed in the aqueous phase after partitioning in a toluene-water system at equilibrium.  
36 The reaction mixture was added to a mixture of 200 mL of toluene and 200 mL of water and then  
37 shaken for 10 s. The toluene and water phases were then separated at equilibrium and the  
38 isolated toluene phase containing dissolved 3OT and P3OT was concentrated by rotary  
39 evaporation after removing the aqueous phase. To remove unreacted 3OT (bp: 106-107°C/3  
40 mmHg), this concentrated mixture of 3OT and P3OT was vacuum dried overnight at 50°C in a  
41 vacuum oven, which resulted in removing 3OT and obtaining P3OT.<sup>7</sup>

42

43 **Molecular weight and molecular-weight distribution of P3OT**

44 The weight average molecular weight and number average molecular weight were determined  
45 using gel permeation chromatography (GPC, Tosoh Co. EcoSEC HLC-8320 GPC) equipped  
46 with columns (Tosoh, 2×TSKgel SuperMultipore HZ-M (4.6 × 150 mm)) and an RI detector  
47 using polystyrene standards and tetrahydrofuran (THF) as an eluent at a flow rate of 0.35 mL  
48 min<sup>-1</sup> and a data module at 40°C. The molecular weights were obtained from the refractive index  
49 data, which were analyzed with EcoSEC software.<sup>7</sup>

50 **S2. Yield comparison**

51

52 **Table S1.** Yield comparison of P3OT via oxidative polymerization in various DESs.

| Solvents                        | Temp (°C) | Polymerization time | Yield (%) |
|---------------------------------|-----------|---------------------|-----------|
| [Ch]Cl:urea                     | 25        | 1 h                 | 59        |
| [Ch]Cl:urea                     | 25        | 4 h                 | 81        |
| [Ch]Cl:urea                     | 25        | 10 h                | 100       |
| [Ch]Cl:urea                     | 50        | 1 h                 | 83        |
| [Ch]Cl:urea                     | 50        | 2 h                 | 100       |
| [Ch]Cl:urea:thiourea            | 50        | 1 h                 | 37        |
| [Ch]Cl:urea:thiourea            | 50        | 2 h                 | 87        |
| [Ch]Cl:urea:thiourea            | 50        | 3h                  | 100       |
| [Ch]Cl:formamide:thiourea       | 25        | 3h                  | 6         |
| [Ch]Cl:formamide:thiourea       | 25        | 6h                  | 12        |
| [Ch]Cl:formamide:thiourea       | 25        | 10h                 | 16        |
| [Ch]Cl:formamide:thiourea       | 25        | 24 h                | 34        |
| [Ch]Cl:formamide:thiourea       | 25        | 48 h                | 50        |
| [Ch]Cl:formamide:thiourea       | 50        | 3 h                 | 15        |
| [Ch]Cl:formamide:thiourea       | 50        | 6 h                 | 28        |
| [Ch]Cl:glycerol                 | 25        | 48 h                | 8         |
| [Ch]Cl:ethylene glycol          | 25        | 48 h                | 1         |
| [Ch]Cl:urea:glycerol            | 25        | 48 h                | 18        |
| [Ch]Cl:urea:ethylene glycol     | 25        | 48 h                | 24        |
| [Ch]Cl:glycerol:ethylene glycol | 25        | 48 h                | 6         |
| [Ch]Cl:glycerol:formamide       | 25        | 48 h                | 14        |
| [Ch]Cl:glycerol:thiourea        | 25        | 48 h                | 6         |
| [Ch]Cl:ethyleneglycol:formamide | 25        | 48 h                | 1         |
| [Ch]Cl:ethyleneglycol:thiourea  | 25        | 48 h                | 18        |
| [BmIm][SbF <sub>6</sub> ]       | 25        | 6 h                 | 53        |
| [BmIm][SbF <sub>6</sub> ]       | 25        | 10 h                | 65        |
| [BmIm][SbF <sub>6</sub> ]       | 50        | 3 h                 | 45        |
| [BmIm][SbF <sub>6</sub> ]       | 50        | 6 h                 | 65        |
| CHCl <sub>3</sub>               | 25        | 1 h                 | 70        |
| CHCl <sub>3</sub>               | 25        | 4 h                 | 79        |
| CHCl <sub>3</sub>               | 25        | 10 h                | 85        |

53 **S3. FTIR spectra of P3OT**

54

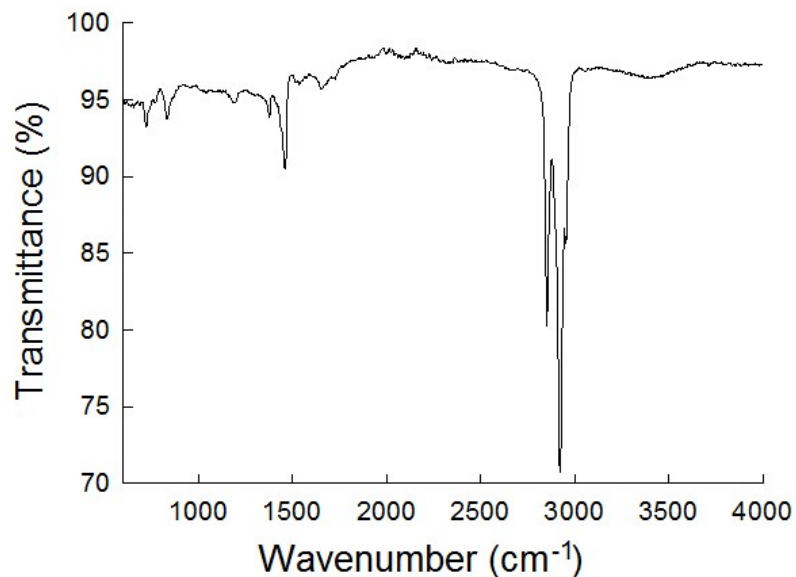

55

56 **Figure S1.** FTIR spectra of P3OT

57

58 Figure S1 shows FTIR spectra of P3OT polymerized using [Ch]Cl:urea. In the FTIR spectrum,  
59 there were several intensity peaks present in the range of 2800–3000 cm<sup>-1</sup>, which can be  
60 attributed to the C–H stretching modes of alkyl side chain, the range of 1400-1550 cm<sup>-1</sup> ascribed  
61 to the C=C stretching vibration modes of conjugated backbones, and the aromatic C-H out-of-  
62 plain was around 832 cm<sup>-1</sup>. The peak at 722 cm<sup>-1</sup> is attributed to the characteristic absorption of S  
63 atom on the polythiophene ring.

64 **S4. NMR spectroscopy of P3OT**

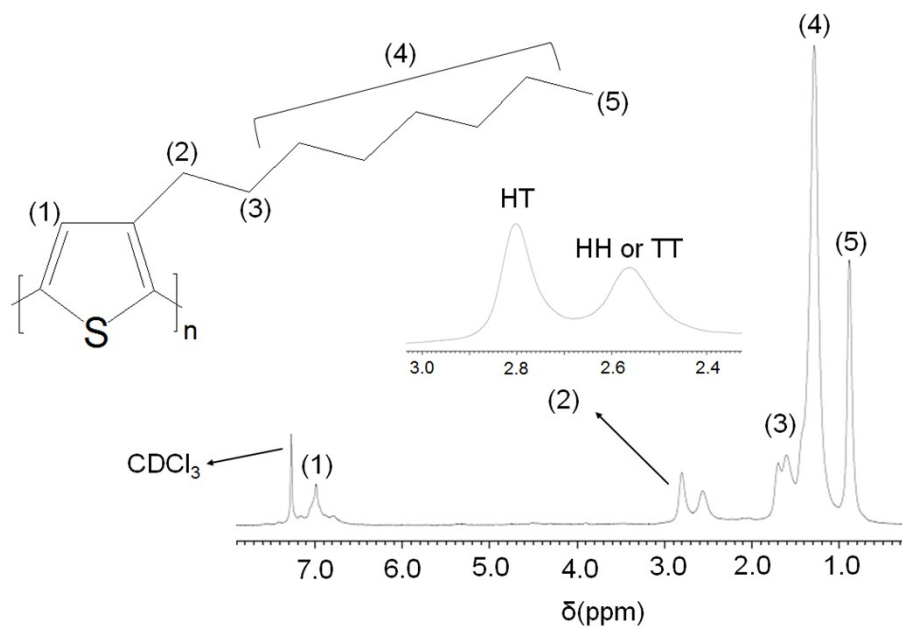

65

66

(a)

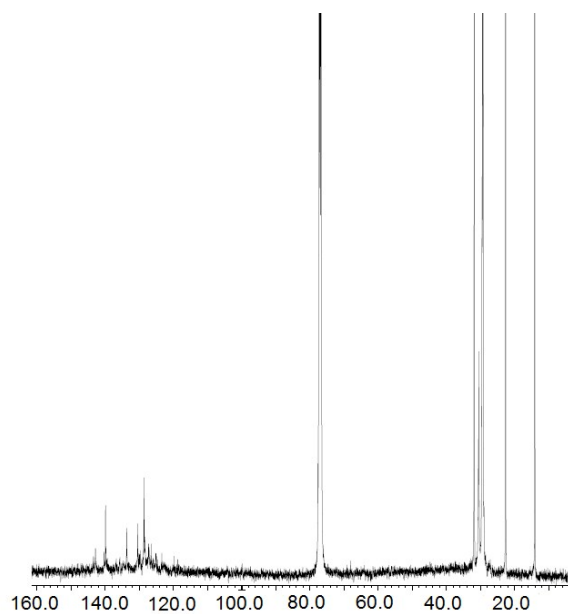

67

68

(b)

69 **Figure S2.** Representative (a) <sup>1</sup>H NMR spectrum and (b) <sup>13</sup>C NMR spectrum of P3OT prepared  
70 using [Ch]Cl:urea.

71 Figure S2 (a) represents  $^1\text{H}$  NMR spectrum of P3OT polymerized using [Ch]Cl:urea. For a  
72 quantitative determination of the regioregularity degrees,  $^1\text{H}$  NMR spectra were recorded for all  
73 samples in  $\text{CDCl}_3$  solutions. A single peak at around 6.9 ppm is attributed to the aromatic proton  
74 at position 4 of the thiophene ring. The peaks appearing between 0.7 and 1.8 ppm are attributed  
75 to the methyl and six of the methylene groups of the side-chain. The signal of methylene linked  
76 to thiophene ring is affected by the regioregularity of the polymer. The methylene signal of the  
77 head-to-tail (HT) dyad appears at 2.80 ppm and the methylene of the head-to-head (HH) or tail-  
78 to-tail (TT) dyad at 2.57 ppm. The regioregularity degree was calculated by the ratio of these 1)  
79 HT peak and 2) HH or TT peak area. The HT content was calculated to be 55%. Figure S2 (b)  
80 shows the full  $^{13}\text{C}$  spectrum for our P3OT. The alkyl region only shows eight absorptions  
81 corresponding to the octyl side chain at 14.2, 22.7, 29.3, 29.5, 29.6, 30.5, 30.7 and 31.9 ppm.<sup>S1-S4</sup>

82 ***S5. PDI comparison***

83

84 **Table S2.** PDI comparison of PATs from previous literatures in various solvents

| No. | Polymer                 | Oxidant           | Solvent           | Polymerization time | Temp (°C) | PDI      | Yield (%) | Ref.       |
|-----|-------------------------|-------------------|-------------------|---------------------|-----------|----------|-----------|------------|
| 1   | Poly(3-octylthiophene)  | FeCl <sub>3</sub> | [Ch]Cl:U          | 1h                  | 25        | 6.7      | 59        | This study |
| 2   | Poly(3-octylthiophene)  | FeCl <sub>3</sub> | [Ch]Cl:U          | 10h                 | 25        | 12.9     | 100       | This study |
| 3   | Poly(3-octylthiophene)  | FeCl <sub>3</sub> | CHCl <sub>3</sub> | 1h                  | 25        | 5.8      | 70        | This study |
| 4   | Poly(3-octylthiophene)  | FeCl <sub>3</sub> | CHCl <sub>3</sub> | 48h                 | 25        | 12.9     | 87        | This study |
| 5   | Poly(3-hexylthiophene)  | FeCl <sub>3</sub> | Acetone           | 1~6 h               | 0         | 3.4~5.0  | 72~76     | (S5)       |
| 6   | Poly(3-hexylthiophene)  | FeCl <sub>3</sub> | Benzene           | 2h                  | 23        | 5.3      | 47        | (S6)       |
| 7   | Poly(3-hexylthiophene)  | FeCl <sub>3</sub> | Toluene           | 2h                  | 23        | 4.5      | 39        | (S6)       |
| 8   | Poly(3-hexylthiophene)  | FeCl <sub>3</sub> | Xylene            | 2h                  | 23        | 2.1      | 11        | (S6)       |
| 9   | Poly(3-hexylthiophene)  | FeCl <sub>3</sub> | CHCl <sub>3</sub> | 2h                  | 23        | 3.5      | 53        | (S6)       |
| 10  | Poly(3-octylthiophene)  | FeCl <sub>3</sub> | CHCl <sub>3</sub> | 2~24h               | 25        | 4.5~10.9 | 75~80     | (S7)       |
| 11  | Poly(3-decylthiophenes) | FeCl <sub>3</sub> | CHCl <sub>3</sub> | 2~24h               | 25        | 5.5~8.0  | 75~80     | (S7)       |



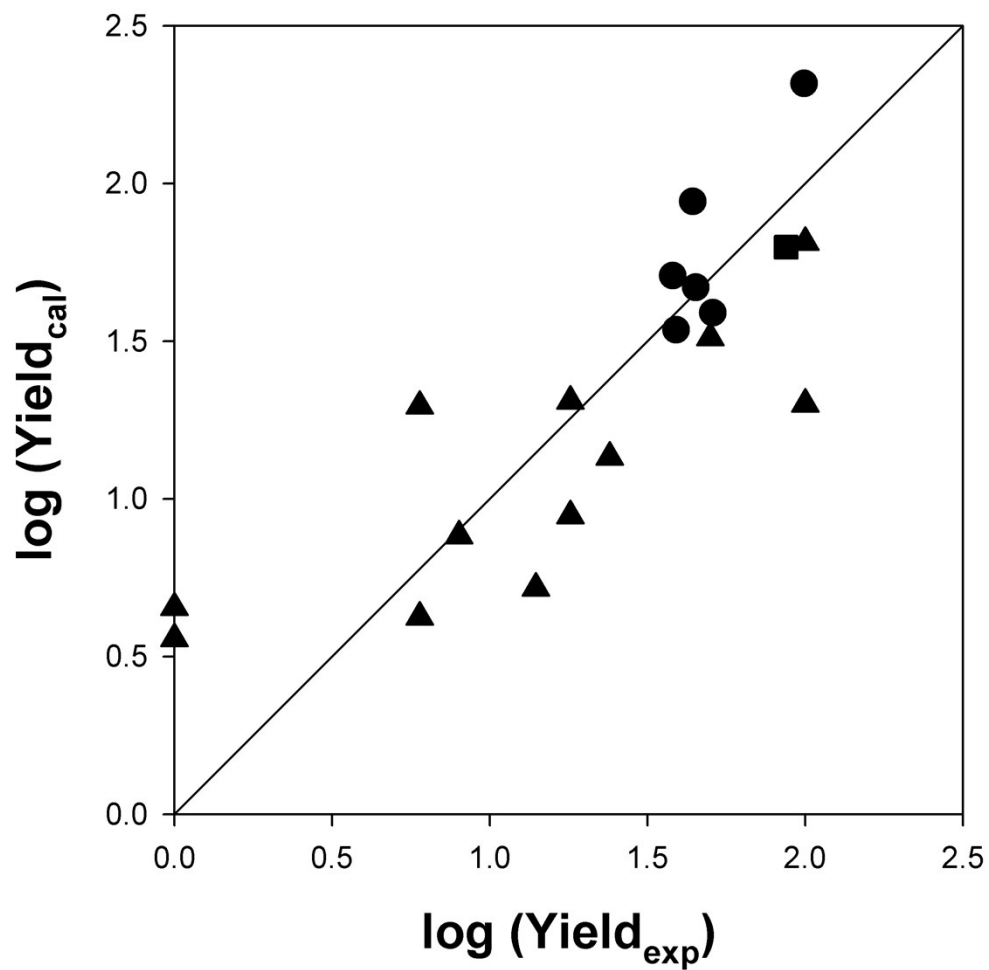

90 **Figure S3.** Calculated values of log (yield) against experimental values of log (yield). ▲: DESs,

91 ●: ILs, and ■: chloroform.

## 92 **References**

93

94 S1 G. Barbarella, A. Bongini and M. Zambianchi, *Macromolecules*, 1994, **27**, 3039.

95 S2 W. M. Facchinatto, B. B. M. Torres and D. T. Balogh, *J. Polym. Res.*, 2016, **23**, 187

96 S3 R. D. McCullough, R. D. Lowe, M. Jayaraman and D. L. Anderson, *J. Org. Chem.*, 1993, **58**,

97 904.

98 S4 M. R. Andersson, D. Selse, M. Berggren, H. Järvinen, T. Hjertberg, O. Inganäs,

99 Wennerström, and J.-E. Österholm, *Macromolecules*, 1994, **27**, 6503.

100 S5 W. M. Facchinatto, B. B. M. Torres and D. T. Balogh, *J. Polym. Res.*, 2016, **23**, 187.

101 S6 Y. Liu, N. Nishiwaki, K. Saigo and R. Sugimoto, *Bull. Chem. Soc. Jpn.*, 2013, **86**, 1076.

102 S7 M. Leclerc, F. M. Diaz and G. Wegner, *Makromol. Chem.*, 1989, **190**, 3105.
